# Supplementary material for: Interannual variability in Transpolar Drift ice thickness andpotential impact of Atlantification
Source: Copernicus journal article supplement (doi:10.5194/tc-2020-305), 2020-10-22
Supplement: Supplementary file 1 [file tc-2020-305-supplement.pdf]

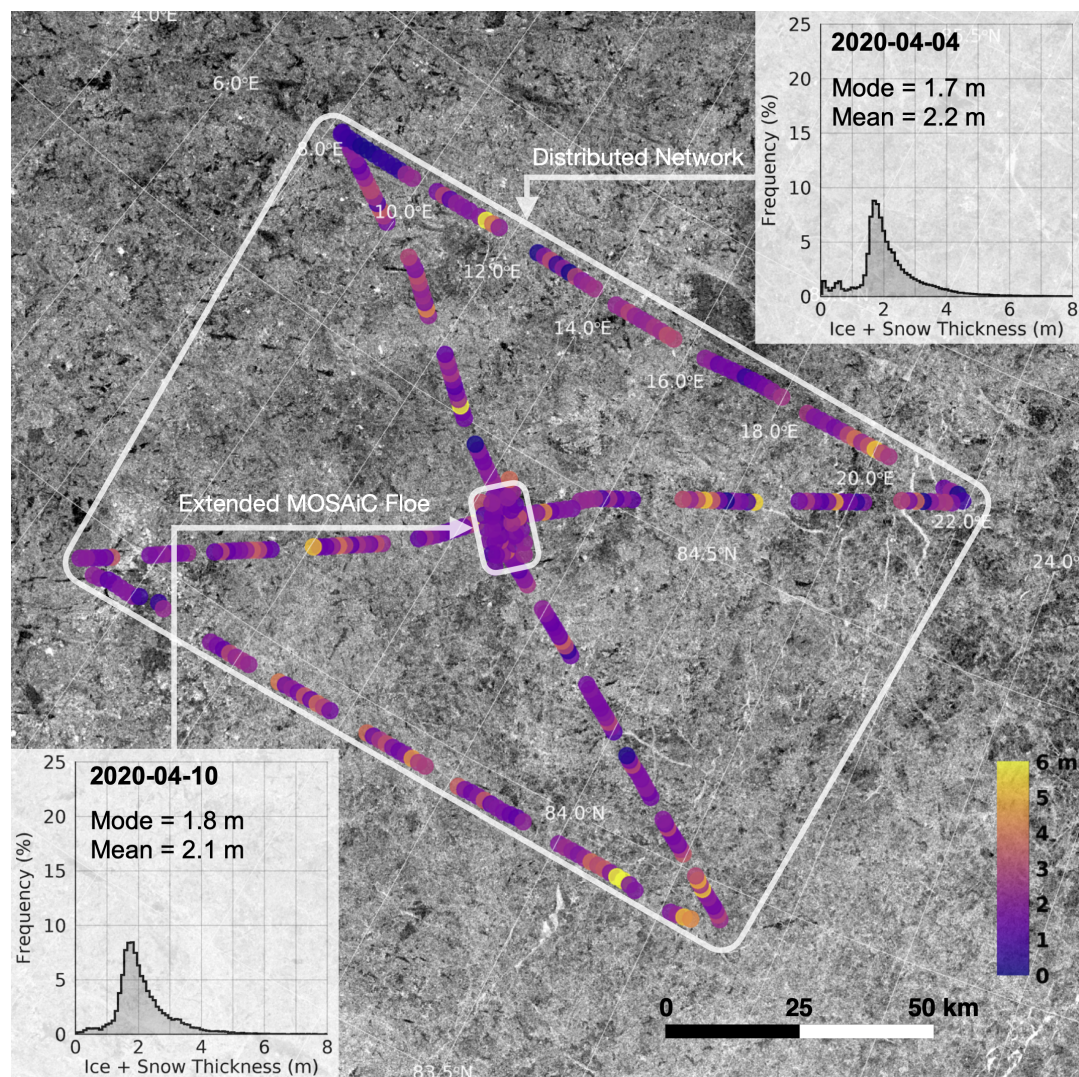

**Figure S1.** Sentinel-1 SAR image from April 10, 2020 (source: ESA) superimposed by airborne EM survey lines and sea ice thickness (SIT) values gathered during Leg 3 of the Multidisciplinary drifting Observatory for the Study of Arctic Climate (MOSAiC). Modal and mean EM SIT values are given for the extended MOSAiC floe (bottom left) and the larger Distributed Network area (top right). At the time of the survey flights the floe was located at approximately 84.5°N and 14°E.

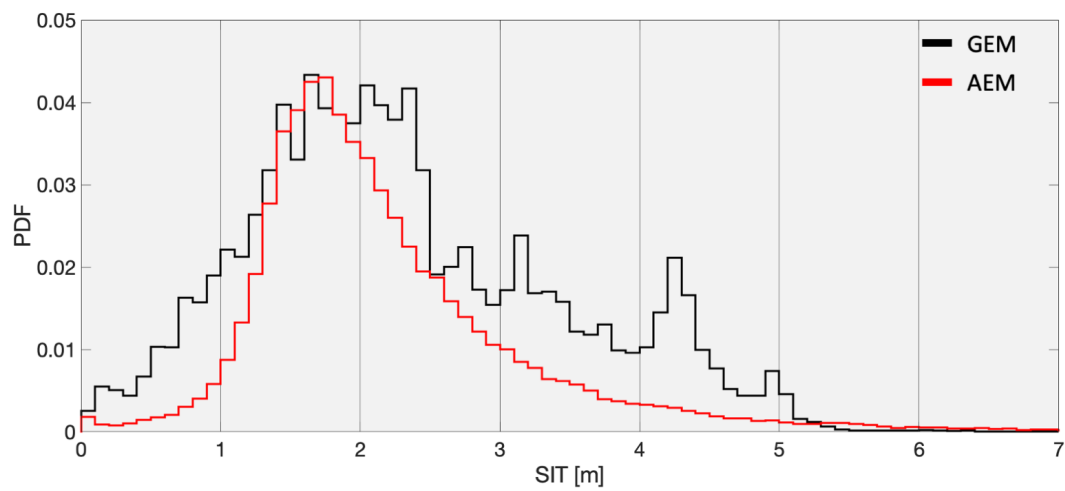

**Figure S2.** Comparison of MOSAiC floe sea ice thickness distribution gathered with the ground-based EM (GEM) between July 16 to July 21, 2020 (black) and airborne EM (AEM) derived sea ice thickness distribution (red) of the floe and wider area (radius about 5 km around the floe) from July 1 and July 7, 2020.
